# Supplementary material for: B cell–intrinsic TLR7 expression drives severe lupus in TLR9-deficient mice
Source: PubMed Central journal article supplement (PMC10543715; doi:10.1172/jci.insight.172219), 2023-08-22
Supplement: jciinsight-8-172219-s150.pdf [file jciinsight-8-172219-s150.pdf]

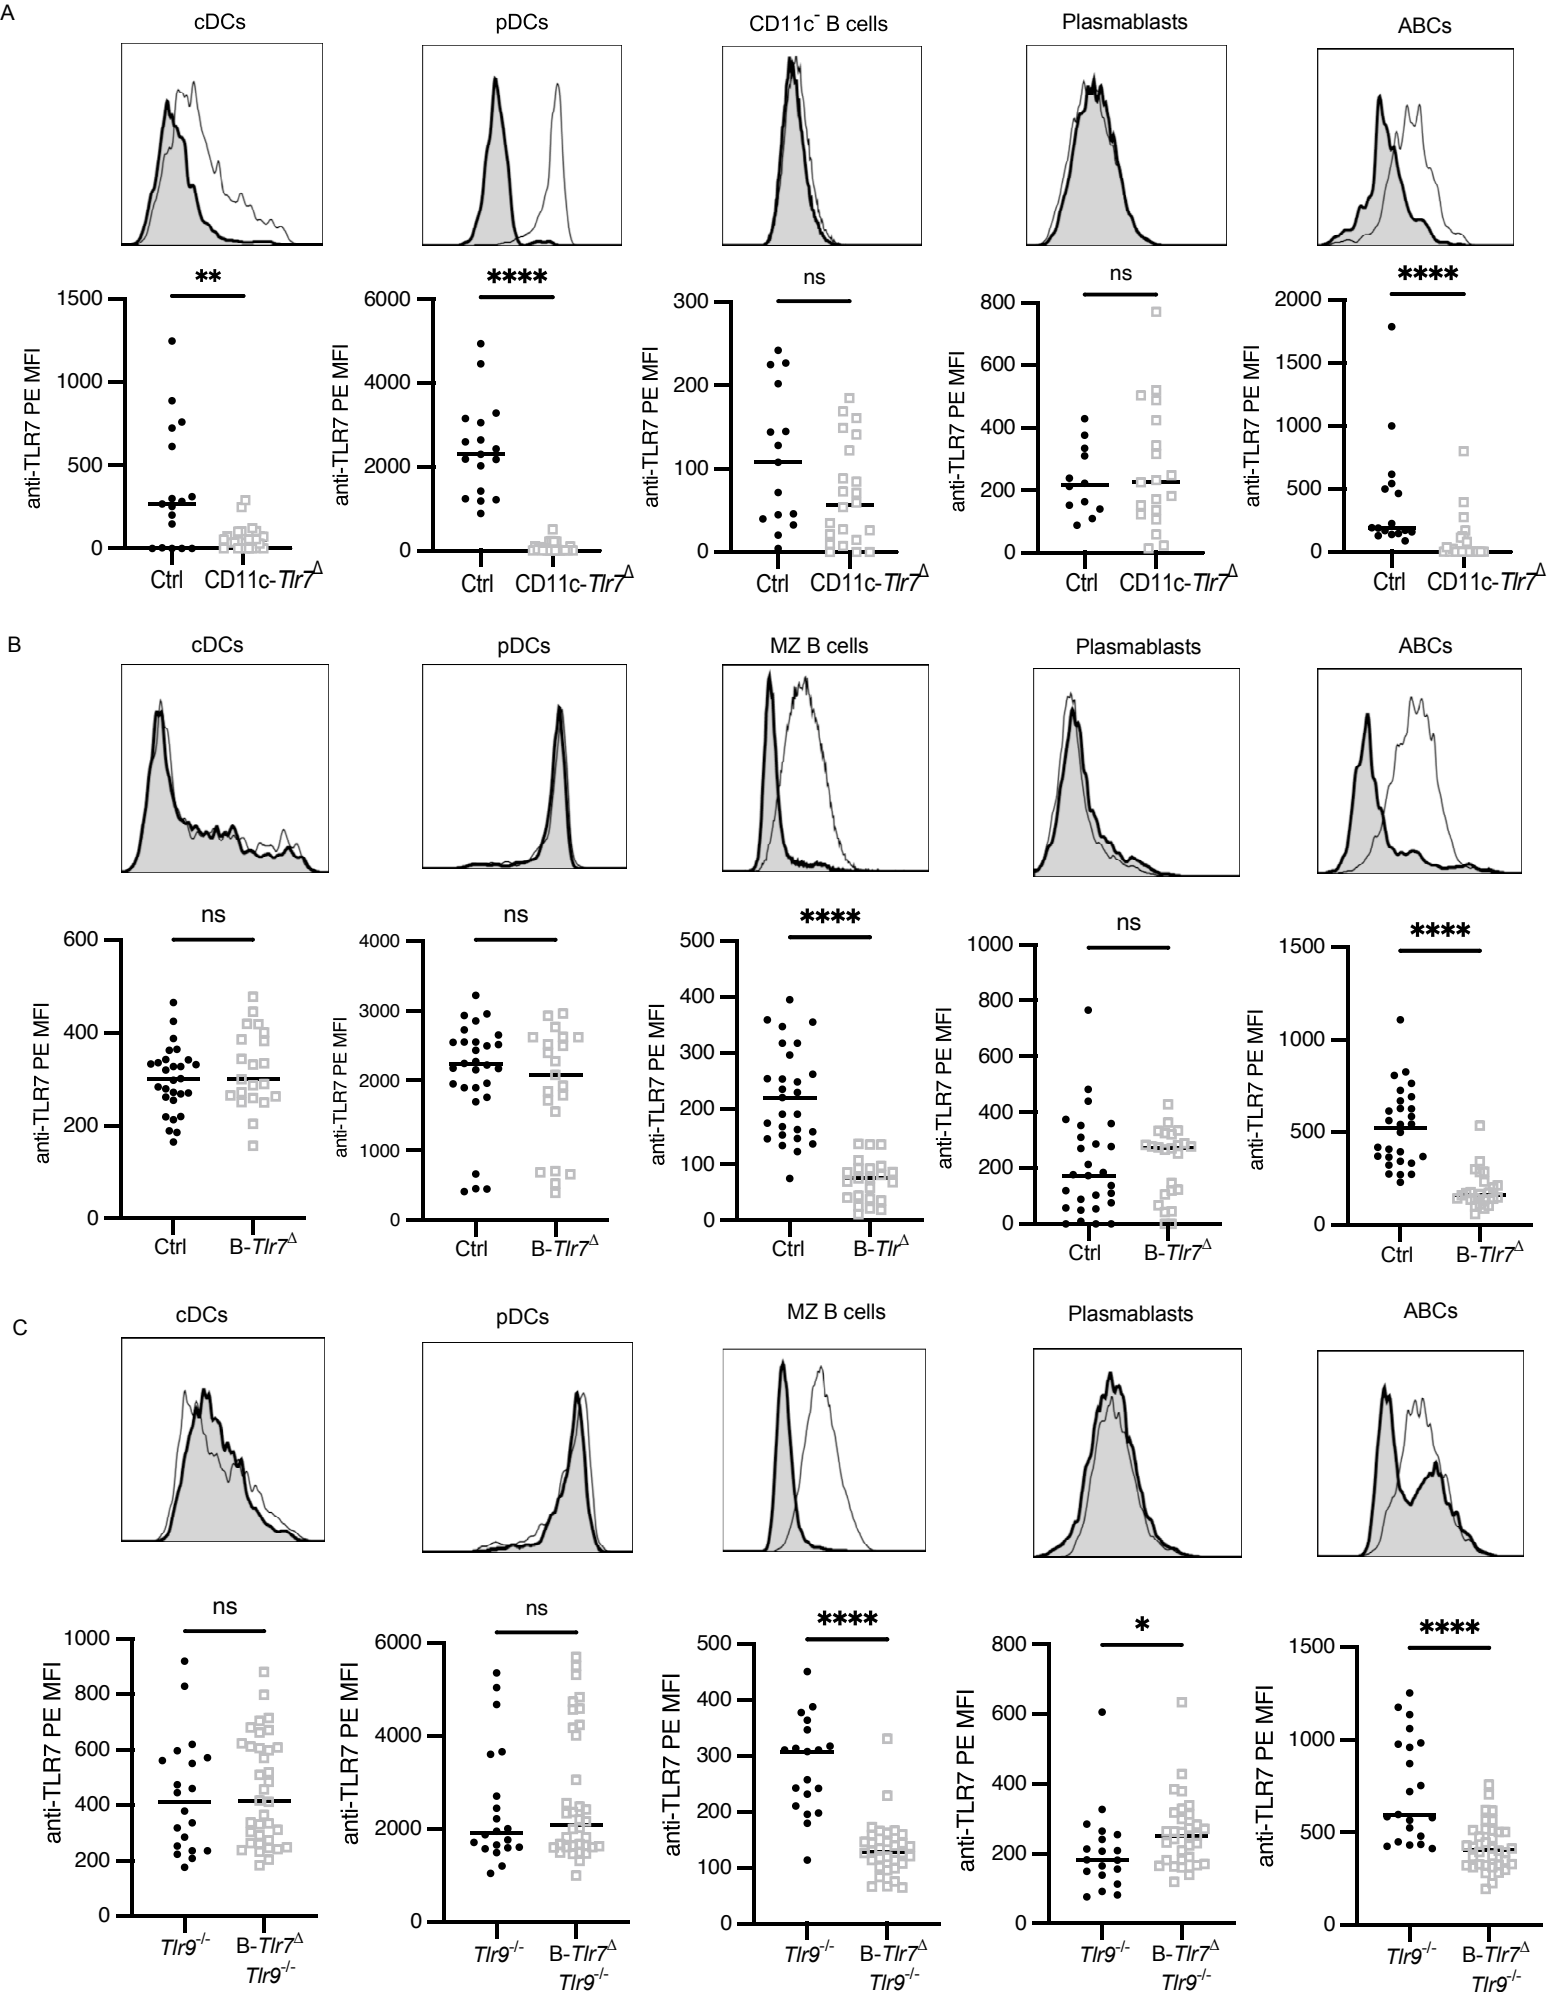

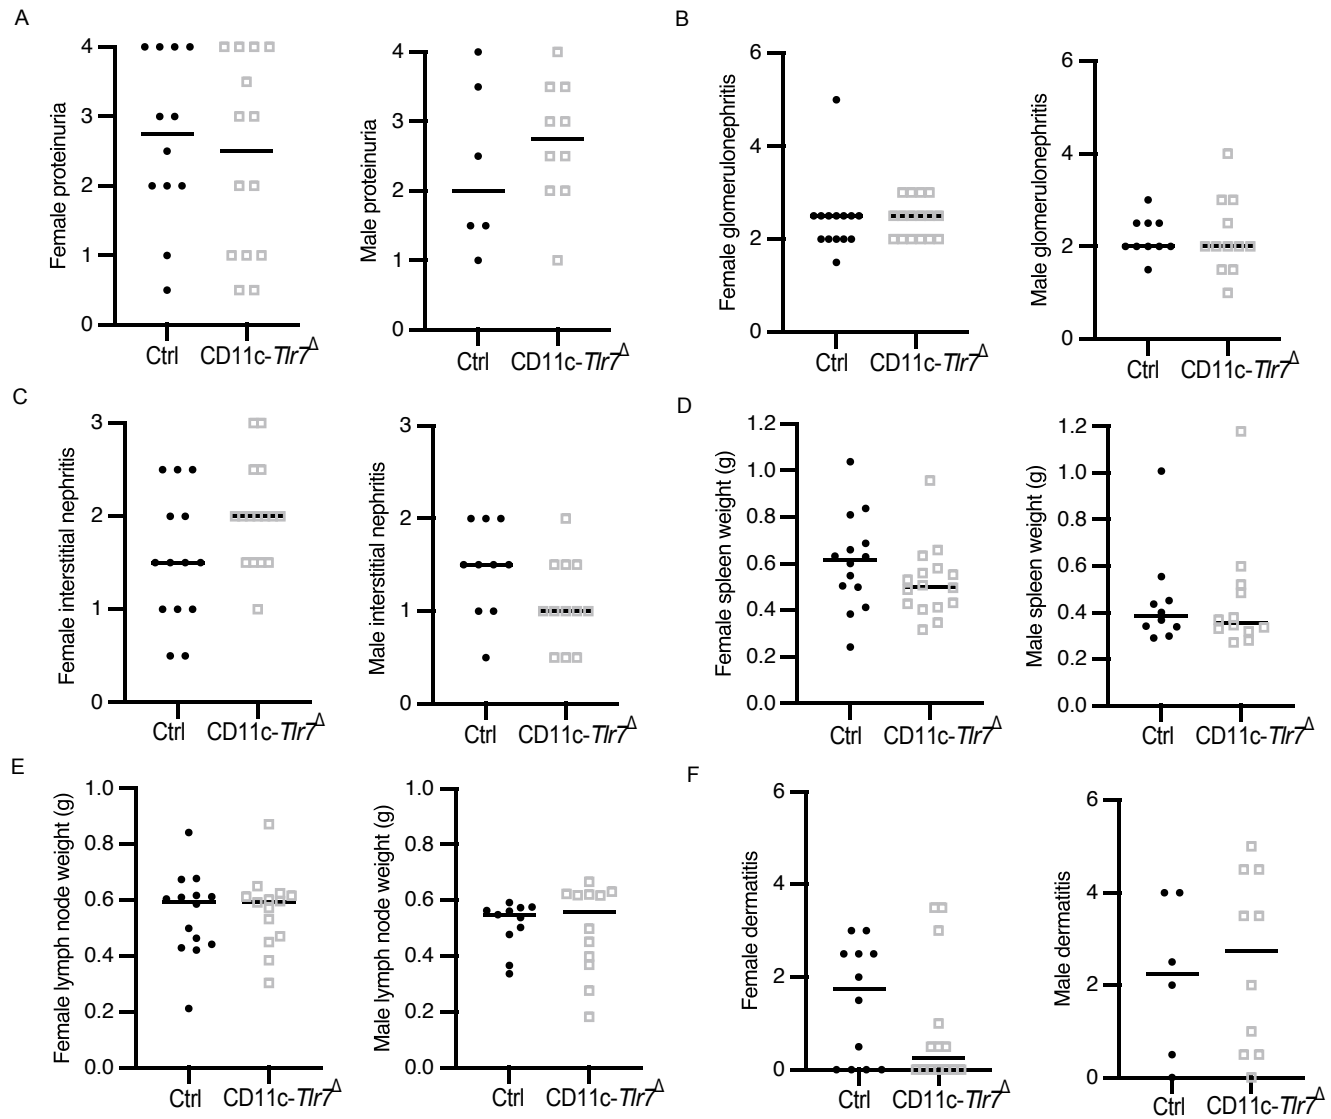

**Supplemental Figure 2. Separate analysis of male and female clinical parameters in CD11c-*Tlr7*<sup>Δ</sup> mice.** Female control (*Tlr7*<sup>fl/fl</sup>) and CD11c-*Tlr7*<sup>Δ</sup> (CD11c-Cre<sup>+/-</sup> *Tlr7*<sup>fl/fl</sup>) mice were aged for 19 weeks. Male control (*Tlr7*<sup>fl/y</sup>) and CD11c-*Tlr7*<sup>Δ</sup> (CD11c-Cre<sup>+/-</sup> *Tlr7*<sup>fl/y</sup>) mice were aged for 22 weeks. **(A-F)** Evaluation of phenotypic disease markers in control and CD11c-*Tlr7*<sup>Δ</sup> mice including: **(A)** proteinuria (females, n=12 and n=14; males, n=6 and n=10), **(B)** glomerulonephritis (females n=14 and n=16; males n=10 and n=12), **(C)** interstitial/perivascular infiltrates (females n=14 and n=16; males n=10 and n=12), **(D)** spleen weight (females n=14 and n=16; males n=10 and n=12), **(E)** lymph node weight (females n=14 and n=14; males n=10 and n=12), and **(F)** dermatitis (females n=14 and n=16; males n=6 and n=10). Scatter plots display data from individual mice with black lines showing median values. \* P<0.05, \*\* P<0.01 by 2-tailed Mann-Whitney *U* test.

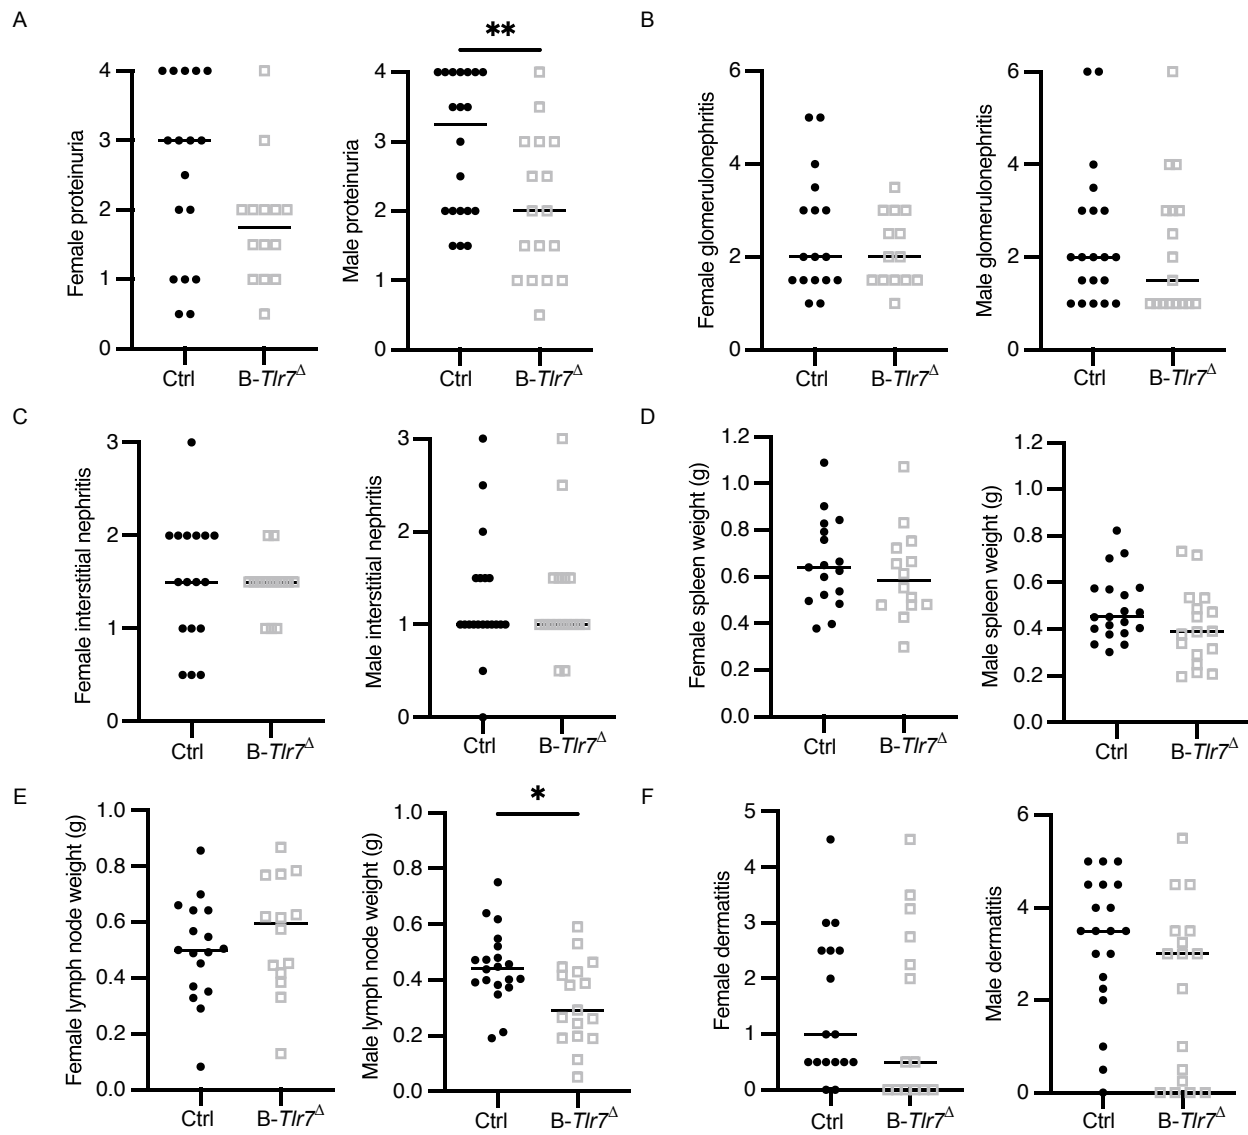

**Supplemental Figure 3. Separate analysis of male and female clinical parameters in B-*Tlr7*<sup>Δ</sup> mice.** Female control (*Tlr7*<sup>fl/fl</sup>) and B-*Tlr7*<sup>Δ</sup> (CD19-Cre<sup>+/+</sup> *Tlr7*<sup>fl/fl</sup>) were aged for 19 weeks. Male control (*Tlr7*<sup>fl/y</sup>) and B-*Tlr7*<sup>Δ</sup> (CD19-Cre<sup>+/+</sup> *Tlr7*<sup>fl/y</sup>) were aged for 22 weeks. **(A-F)** Evaluation of phenotypic disease markers in control and B-*Tlr7*<sup>Δ</sup> mice including: **(A)** proteinuria (females, n=17 and n=14; males, n=20 and n=17), **(B)** glomerulonephritis (females n=17 and n=14; males n=20 and n=17), **(C)** interstitial/perivascular infiltrates (females n=17 and n=14; males n=20 and n=17), **(D)** spleen weight (females n=17 and n=14; males n=20 and n=17), **(E)** lymph node weight (females n=17 and n=14; males n=20 and n=17), and **(F)** dermatitis (females n=17 and n=14; males n=20 and n=17). Scatter plots display data from individual mice with black lines showing median values. \* P<0.05, \*\* P<0.01 by 2-tailed Mann-Whitney *U* test.

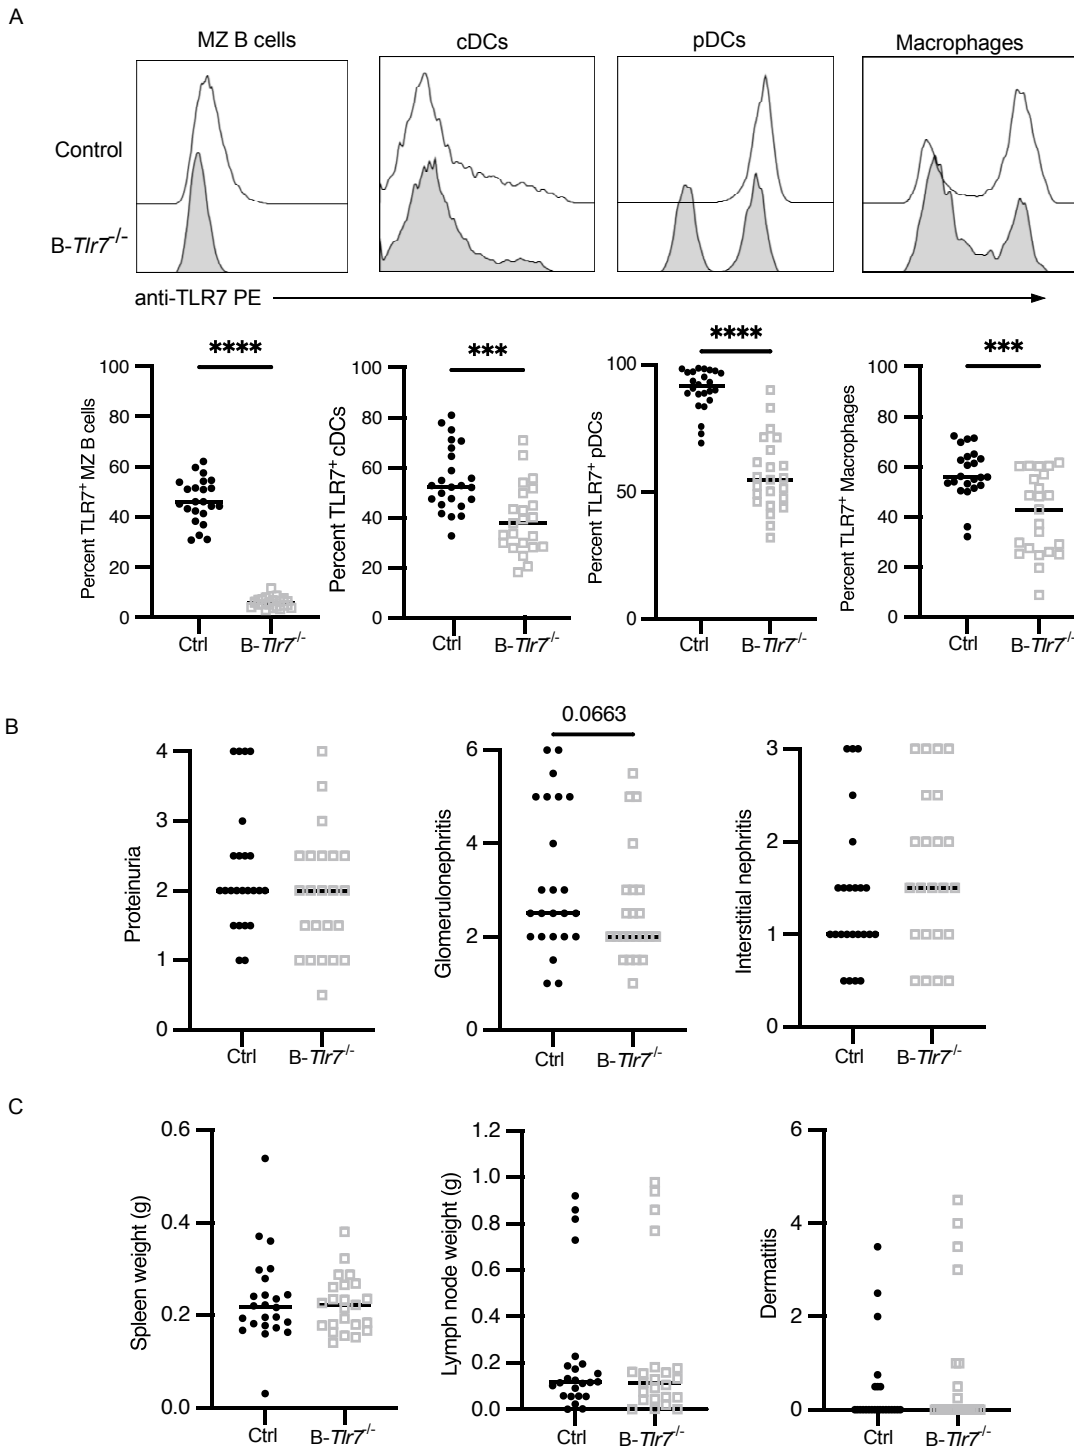

**Supplemental Figure 4. TLR7 expression in B-*Tlr7*<sup>-/-</sup> bone marrow chimeras and combined male and female clinical parameters in the chimeras.** (A) Representative histograms showing TLR7 expression by flow cytometry and tabulated data of percent TLR7<sup>+</sup> cells in control (no fill) and B-*Tlr7*<sup>-/-</sup> (gray fill) mice in relevant cell subsets: Marginal Zone B cells (TCRb<sup>-</sup> CD19<sup>+</sup> CD21/35<sup>+</sup> CD23<sup>-</sup>); cDCs (CD19<sup>+</sup> CD11c<sup>+</sup> MHCII<sup>+</sup>); pDCs (CD19<sup>-</sup> Siglec H<sup>+</sup> CD317<sup>+</sup>); and macrophages (CD19<sup>-</sup> CD11b<sup>+</sup> LyG/C-F4/80<sup>+</sup>) (B) Combined male and female clinical SLE parameters in control vs B-*Tlr7*<sup>-/-</sup> mice, n=24 and n=23 respectively. Scatter plots display data from individual mice with black lines showing median values. \*\*\* P<0.001, \*\*\*\* P<0.0001 by 1-tailed Mann-Whitney *U* test.

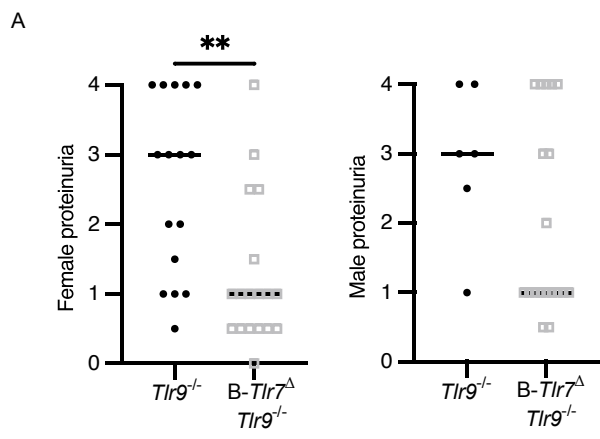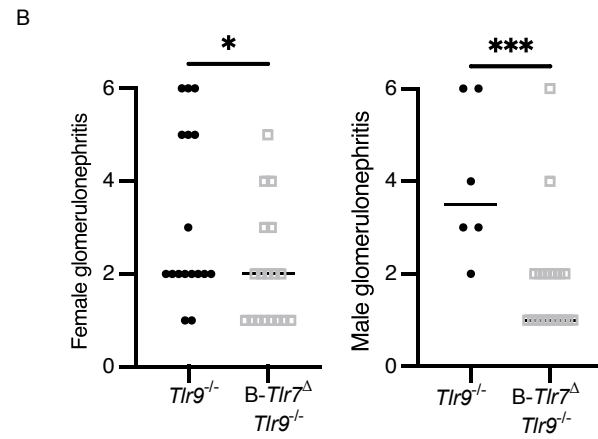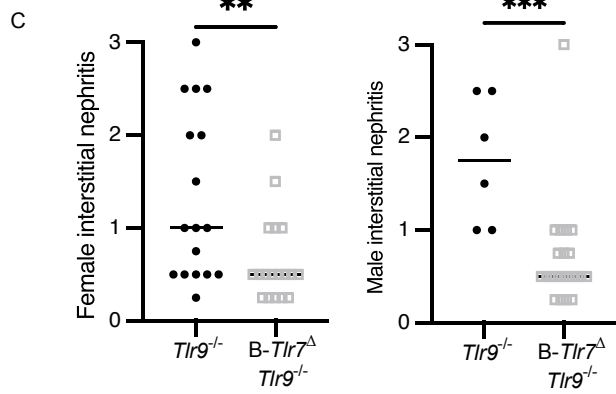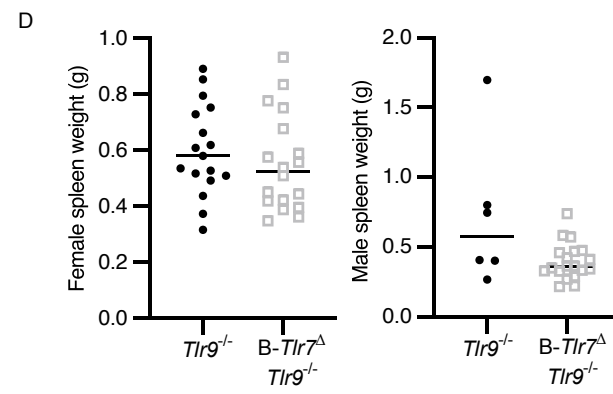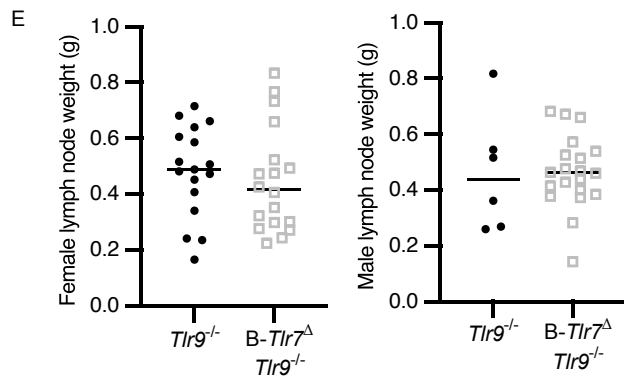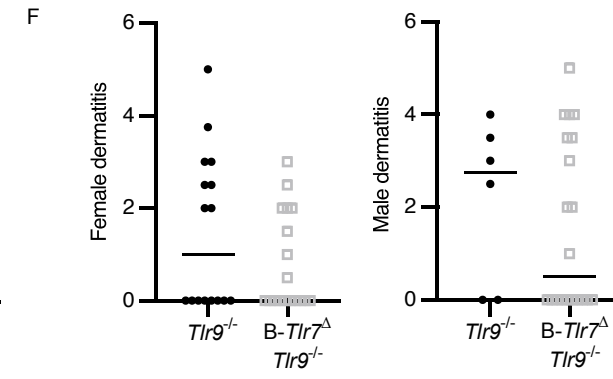

**Supplemental Figure 5. Separate analysis of male and female clinical parameters in B-*Tlr7*<sup>Δ</sup> *Tlr9*<sup>-/-</sup> mice.** Female control (*Tlr7*<sup>fl/y</sup> *Tlr9*<sup>-/-</sup>) and B-*Tlr7*<sup>Δ</sup> (CD19-Cre<sup>+/-</sup> *Tlr7*<sup>fl/y</sup> *Tlr9*<sup>-/-</sup>) were aged for 16 weeks. Male control (*Tlr7*<sup>fl/y</sup> *Tlr9*<sup>-/-</sup>) and B-*Tlr7*<sup>Δ</sup> (CD19-Cre<sup>+/-</sup> *Tlr7*<sup>fl/y</sup> *Tlr9*<sup>-/-</sup>) were aged for 19 weeks. **(A-F)** Evaluation of phenotypic disease markers in control and B-*Tlr7*<sup>Δ</sup> mice including: **(A)** proteinuria (females, n=17 and n=18; males, n=6 and n=19), **(B)** glomerulonephritis (females n=17 and n=18; males n=6 and n=19), **(C)** interstitial/perivascular infiltrates (females n=17 and n=18; males n=6 and n=19), **(D)** spleen weight (females n=17 and n=18; males n=6 and n=19) **(E)** lymph node weight (females n=17 and n=18; males n=6 and n=19), and **(F)** dermatitis (females n=16 and n=18; males n=6 and n=19). Scatter plots display data from individual mice with black lines showing median values. \* P<0.05, \*\* P<0.01 by 2-tailed Mann-Whitney *U* test.

| Autoantibody    | Ctrl                | CD11c-<br><i>Tlr7</i> <sup>Δ</sup> | p-value | Ctrl                | B- <i>Tlr7</i> <sup>Δ</sup> | p-value | <i>Tlr9</i> <sup>-/-</sup> | B- <i>Tlr7</i> <sup>Δ</sup><br><i>Tlr9</i> <sup>-/-</sup> | p-value |
|-----------------|---------------------|------------------------------------|---------|---------------------|-----------------------------|---------|----------------------------|-----------------------------------------------------------|---------|
| Anti-Sm         | 1367.00 ±<br>452.90 | 536.90 ±<br>357.40                 | 0.0037  | 1382.00±<br>513.60  | 0.10 ±<br>0.00              | <0.0001 | 1995.00 ±<br>860.80        | 7.27 ±<br>7.17                                            | <0.0001 |
| Anti-RNA        | 87.74 ±<br>18.68    | 39.80 ±<br>12.14                   | 0.0140  | 22.80 ±<br>7.53     | 3.80 ±<br>1.34              | <0.0001 | 125.40 ±<br>24.34          | 35.81 ±<br>13.77                                          | 0.0002  |
| Anti-nucleosome | 2510.00 ±<br>926.0  | 3485.00 ±<br>728.50                | 0.5796  | 2288.00 ±<br>511.20 | 1997.00 ±<br>462.40         | 0.8416  | 5.07 ±<br>1.70             | 1.62 ±<br>0.64                                            | 0.0213  |

**Supplemental Table 1. Autoantibody titers of MRL/lpr serum from indicated strains.** Data represent mean ± SEM. Gray boxes indicate statistically significant differences by 2-tailed (CD11c-*Tlr7*<sup>Δ</sup> and B-*Tlr7*<sup>Δ</sup> cohorts) or 1-tailed (B-*Tlr7*<sup>Δ</sup> *Tlr9*<sup>-/-</sup>) Mann-Whitney *U* test.

| Cell Type                                                    | Ctrl         | CD11c- <i>Tlr7</i> <sup>Δ</sup> | Ctrl         | B- <i>Tlr7</i> <sup>Δ</sup> | B- <i>Tlr7</i> <sup>hi+</sup> | B- <i>Tlr7</i> <sup>-/-</sup> | <i>TLR9</i> <sup>-/-</sup> | B- <i>Tlr7</i> <sup>Δ</sup> <i>Tlr9</i> <sup>-/-</sup> |
|--------------------------------------------------------------|--------------|---------------------------------|--------------|-----------------------------|-------------------------------|-------------------------------|----------------------------|--------------------------------------------------------|
| B cells                                                      | 16.36 ± 1.87 | 17.35 ± 1.57                    | 11.77 ± 1.21 | 10.47 ± 0.98                | 8.42 ± 1.29                   | 10.78 ± 1.47                  | 10.54 ± 1.80               | 16.93 ± 1.72                                           |
| Marginal Zone (% of B cells)                                 | 32.48 ± 2.25 | 33.15 ± 2.73                    | 40.96 ± 3.11 | 46.23 ± 2.50                | 10.20 ± 1.76                  | 14.47 ± 1.54                  | 21.92 ± 2.23               | 32.43 ± 1.84                                           |
| Follicular (% of B cells)                                    | 35.11 ± 3.95 | 33.02 ± 2.57                    | 25.85 ± 2.04 | 27.68 ± 2.22                | 6.18 ± 0.83                   | 10.20 ± 1.76                  | 38.86 ± 2.43               | 38.60 ± 1.77                                           |
| CD11b <sup>+</sup> CD11c <sup>+</sup> B cells (% of B cells) | 2.21 ± 0.23  | 2.56 ± 0.28                     | 6.28 ± 0.69  | 6.25 ± 0.72                 | 3.33 ± 0.40                   | 4.46 ± 0.56                   | 3.05 ± 0.32                | 3.07 ± 0.29                                            |
| Plasmablasts (% of TCRβ <sup>+</sup> )                       | 2.18 ± 0.34  | 1.51 ± 0.17                     | 1.85 ± 0.44  | 1.79 ± 0.47                 | 2.26 ± 0.29                   | 2.56 ± 0.33                   | 2.16 ± 0.39                | 2.05 ± 0.30                                            |
| cDCs (% of CD19 <sup>+</sup> )                               | 0.54 ± 0.06  | 0.41 ± 0.04                     | 1.44 ± 0.25  | 1.19 ± 0.18                 | 1.59 ± 0.15                   | 1.07 ± 0.10                   | 0.50 ± 0.07                | 0.68 ± 0.05                                            |
| pDCs (% of CD19 <sup>+</sup> )                               | 0.25 ± 0.03  | 0.22 ± 0.02                     | 0.15 ± 0.02  | 0.16 ± 0.02                 | 0.36 ± 0.03                   | 0.36 ± 0.04                   | 0.20 ± 0.03                | 0.28 ± 0.02                                            |
| T cells                                                      | 49.54 ± 2.76 | 41.45 ± 3.16                    | 46.16 ± 3.23 | 45.68 ± 3.14                | 37.15 ± 1.66                  | 35.85 ± 1.40                  | 49.64 ± 3.86               | 45.81 ± 2.19                                           |
| CD4 T cells (% of T cells)                                   | 24.64 ± 1.40 | 30.52 ± 1.88                    | 30.28 ± 2.03 | 32.04 ± 2.04                | 57.74 ± 0.90                  | 56.31 ± 1.71                  | 25.98 ± 3.01               | 28.91 ± 1.44                                           |
| CD4 naïve T cells (% of CD4 T cells)                         | 4.49 ± 0.47  | 4.24 ± 0.44                     | 5.64 ± 0.93  | 6.43 ± 1.00                 | 3.29 ± 0.37                   | 3.94 ± 0.45                   | 2.82 ± 0.29                | 4.11 ± 0.32                                            |
| CD8 T cells (% of T cells)                                   | 22.31 ± 1.21 | 20.58 ± 1.03                    | 19.94 ± 1.16 | 21.70 ± 1.23                | 21.47 ± 0.87                  | 20.66 ± 0.71                  | 14.81 ± 1.78               | 23.16 ± 1.43                                           |
| CD8 naïve T cells (% of CD8 T cells)                         | 11.76 ± 0.79 | 12.20 ± 0.92                    | 10.05 ± 0.62 | 10.65 ± 0.63                | 11.46 ± 1.48                  | 12.57 ± 1.41                  | 6.30 ± 0.55                | 8.56 ± 0.48                                            |
| Double negative T cells (% of T cells)                       | 50.48 ± 2.08 | 45.57 ± 1.94                    | 46.69 ± 2.25 | 43.56 ± 2.00                | 16.01 ± 0.78                  | 18.55 ± 1.56                  | 52.66 ± 4.55               | 43.86 ± 2.57                                           |
| Macrophages (% of CD11b <sup>+</sup> CD19 <sup>-</sup> )     | 8.91 ± 0.78  | 8.05 ± 1.06                     | 7.82 ± 1.01  | 9.57 ± 1.26                 | 5.80 ± 0.93                   | 4.75 ± 0.90                   | 9.74 ± 1.31                | 9.82 ± 0.75                                            |
| Monocytes (% of CD11b <sup>+</sup> CD19 <sup>-</sup> )       | 12.12 ± 1.22 | 14.14 ± 1.66                    | 7.47 ± 0.91  | 7.41 ± 0.88                 | 16.12 ± 0.92                  | 15.69 ± 0.91                  | 8.99 ± 1.05                | 12.08 ± 0.97                                           |
| Neutrophils (% of CD11b <sup>+</sup> CD19 <sup>-</sup> )     | 22.33 ± 3.50 | 34.53 ± 4.24                    | 33.62 ± 3.36 | 31.03 ± 3.17                | 51.77 ± 2.82                  | 44.60 ± 4.60                  | 37.76 ± 3.06               | 39.52 ± 2.26                                           |

**Supplemental Table 2. Percent cell compositions of MRL/lpr spleens from indicated strains.** Data represent mean ± SEM. Gray boxes indicate statistically significant differences by 2-tailed (CD11c-*Tlr7*<sup>Δ</sup> and B-*Tlr7*<sup>Δ</sup> cohorts) or 1-tailed (B-*Tlr7*<sup>-/-</sup> and B-*Tlr7*<sup>Δ</sup> *Tlr9*<sup>-/-</sup> cohorts) Mann-Whitney *U* test.

| Clinical Parameter     | Sex    | Ctrl        | CD11c-<br>Tlr7 <sup>Δ</sup> | p-value       | Ctrl        | B-Tlr7 <sup>Δ</sup> | p-value      | Ctrl        | B-<br>Tlr7 <sup>-/-</sup> | p-value       | Tlr9 <sup>-/-</sup> | B-<br>Tlr7 <sup>Δ</sup><br>Tlr9 <sup>-/-</sup> | p-value       |
|------------------------|--------|-------------|-----------------------------|---------------|-------------|---------------------|--------------|-------------|---------------------------|---------------|---------------------|------------------------------------------------|---------------|
|                        |        |             |                             |               |             |                     |              |             |                           |               |                     |                                                |               |
| Proteinuria            | All    | 2.56 ± 0.28 | 2.52 ± 0.25                 | 0.9232        | 2.73 ± 0.19 | 1.92 ± 0.17         | .0034        | 2.29 ± 0.19 | 1.94 ± 0.18               | 0.1143        | 2.63 ± 0.25         | 1.64 ± 0.21                                    | 0.0014        |
|                        | Male   | 2.33 ± 0.49 | 2.70 ± 0.28                 | 0.5366        | 2.93 ± 0.23 | 2.03 ± 0.25         | .0014        | 1.96 ± 0.14 | 2.10 ± 0.19               | 0.2632        | 2.92 ± 0.45         | 2.00 ± 0.32                                    | <b>0.0781</b> |
|                        | Female | 2.67 ± 0.35 | 2.40 ± 0.38                 | 0.6358        | 2.50 ± 0.32 | 1.79 ± 0.24         | <b>.0643</b> | 2.58 ± 0.30 | 1.81 ± 0.29               | 0.0316        | 2.56 ± 0.32         | 1.25 ± 0.25                                    | 0.0011        |
| Glomerulonephritis     | All    | 2.33 ± 0.14 | 2.34 ± 0.11                 | 0.7041        | 2.43 ± 0.23 | 2.16 ± 0.21         | .2137        | 3.19 ± 0.32 | 2.57 ± 0.25               | <b>0.0663</b> | 3.39 ± 0.38         | 1.92 ± 0.21                                    | 0.0001        |
|                        | Male   | 2.20 ± 0.13 | 2.21 ± 0.23                 | 0.7545        | 2.40 ± 0.34 | 2.18 ± 0.36         | .4891        | 2.69 ± 0.38 | 2.35 ± 0.39               | 0.2449        | 4.00 ± 0.68         | 1.79 ± 0.29                                    | 0.0009        |
|                        | Female | 2.43 ± 0.22 | 2.44 ± 0.10                 | 0.4412        | 2.47 ± 0.31 | 2.14 ± 0.21         | .6821        | 3.62 ± 0.48 | 2.55 ± 0.30               | <b>0.0594</b> | 3.18 ± 0.45         | 2.06 ± 0.30                                    | 0.0204        |
| Interstitial Nephritis | All    | 1.50 ± 0.12 | 1.61 ± 0.13                 | 0.6271        | 1.37 ± 0.11 | 1.36 ± 0.09         | .4650        | 1.40 ± 0.16 | 1.67 ± 0.18               | 0.1175        | 1.44 ± 0.18         | 0.69 ± 0.09                                    | 0.0001        |
|                        | Male   | 1.45 ± 0.16 | 1.08 ± 0.14                 | 0.1136        | 1.25 ± 0.15 | 1.27 ± 0.16         | .9698        | 1.00 ± 0.12 | 1.40 ± 0.23               | 0.0972        | 1.75 ± 0.28         | 0.70 ± 0.13                                    | 0.0003        |
|                        | Female | 1.54 ± 0.19 | 2.00 ± 0.14                 | <b>0.0693</b> | 1.50 ± 0.17 | 1.46 ± 0.08         | .7661        | 1.73 ± 0.24 | 1.89 ± 0.25               | 0.3562        | 1.32 ± 0.22         | 0.65 ± 0.11                                    | 0.0052        |
| Spleen Weight          | All    | 0.54 ± 0.04 | 0.49 ± 0.04                 | 0.3382        | 0.57 ± 0.03 | 0.50 ± 0.04         | .1532        | 0.23 ± 0.02 | 0.22 ± 0.01               | 0.3541        | 0.63 ± 0.06         | 0.47 ± 0.03                                    | 0.0056        |
|                        | Male   | 0.45 ± 0.07 | 0.45 ± 0.07                 | 0.7713        | 0.49 ± 0.03 | 0.41 ± 0.04         | .1035        | 0.19 ± 0.01 | 0.19 ± 0.02               | 0.3523        | 0.72 ± 0.21         | 0.40 ± 0.03                                    | <b>0.0674</b> |
|                        | Female | 0.61 ± 0.05 | 0.52 ± 0.04                 | 0.1536        | 0.66 ± 0.71 | 0.61 ± 0.05         | .4043        | 0.27 ± 0.03 | 0.25 ± 0.02               | 0.2577        | 0.60 ± 0.04         | 0.55 ± 0.04                                    | 0.3558        |
| LN Weight              | All    | 0.53 ± 0.03 | 0.53 ± 0.03                 | 0.5601        | 0.47 ± 0.03 | 0.43 ± 0.04         | .2426        | 0.23 ± 0.06 | 0.23 ± 0.07               | 0.3194        | 0.48 ± 0.04         | 0.46 ± 0.03                                    | 0.2742        |
|                        | Male   | 0.51 ± 0.03 | 0.50 ± 0.05                 | 0.5824        | 0.45 ± 0.03 | 0.32 ± 0.04         | .0157        | 0.24 ± 0.10 | 0.22 ± 0.11               | 0.1618        | 0.46 ± 0.09         | 0.46 ± 0.03                                    | 0.3722        |
|                        | Female | 0.55 ± 0.04 | 0.56 ± 0.04                 | 0.9554        | 0.50 ± 0.04 | 0.56 ± 0.06         | .4743        | 0.22 ± 0.07 | 0.24 ± 0.08               | 0.4259        | 0.48 ± 0.04         | 0.45 ± 0.04                                    | 0.2338        |
| Dermatitis             | All    | 1.69 ± 0.33 | 1.56 ± 0.36                 | 0.8025        | 2.43 ± 0.27 | 1.84 ± 0.32         | .0961        | 0.43 ± 0.19 | 0.77 ± 0.30               | 0.2741        | 1.67 ± 0.36         | 1.26 ± 0.26                                    | 0.2013        |
|                        | Male   | 2.17 ± 0.69 | 2.50 ± 0.61                 | 0.6924        | 3.24 ± 0.33 | 2.22 ± 0.45         | .0740        | 0.27 ± 0.23 | 0.50 ± 0.40               | 0.7243        | 2.17 ± 0.71         | 1.60 ± 0.41                                    | 0.2887        |
|                        | Female | 1.46 ± 0.37 | 0.89 ± 0.36                 | 0.3898        | 1.47 ± 0.32 | 1.38 ± 0.43         | .4537        | 0.56 ± 0.29 | 0.98 ± 0.44               | 0.6205        | 1.48 ± 0.42         | 0.81 ± 0.25                                    | 0.1423        |

**Supplemental Table 3. Clinical data of MRL/lpr mice from indicated strains.** Data represent mean ± SEM. Gray boxes indicate statistically significant differences and bold text indicates data trending towards significance by 2-tailed (CD11c-Tlr7<sup>Δ</sup> and B-Tlr7<sup>Δ</sup> cohorts) or 1-tailed (B-Tlr7<sup>-/-</sup> and B-Tlr7<sup>Δ</sup> Tlr9<sup>-/-</sup>) Mann-Whitney *U* test.
